# Supplementary material for: The Diagnostic and Prognostic Value of sTM, t-PA, and NLRP3 in ICU Patients with Sepsis
Source: Research Square preprint supplement (doi:10.21203/rs.3.rs-7323539/v1), 2025-09-23
Supplement: Supplementary file 2 [file 9895ff1e70df19af348aa846.xlsx]

## Sheet: Sheet1
Number	Height	body weight	BMI	Hypertension (Present 1)	Diabetes Mellitus（Present 1）	Cardiovascular Disease（Present 1）	Cerebral Infarction / Cerebral Hemorrhage（Present 1）	Respiratory system diseases（Present 1）	Tumor（Present 1）	Chronic kidney disease（Present 1）	Blood system diseases（Present 1）	Autoimmune system diseases（(Present 1）	APACHEII	SOFA	MODS group (> 2 systems)	Non-MODS group	Sepsis	Septic shock	Mechanical ventilation (none 0, high flow 1, non-invasive 2, invasive 3)	pressor drugs	CRRT	28-day survival rate (death: 1, alive: 0)	WBC	N	L	PLT	NLR	PLR	ALT	AST	BUN	Cr	The fluctuation value of Na+ (maximum - minimum)	Admission blood sodium	48h	Discharge serum sodium level		CRP	IL-6	PCT	D-D	TM	t-PA	Lac	P/F	NLRP3	NLRP3-1	NLRP3-2	NLRP3-3
1	165	65	23.8751	1	1	1			1				23	8	1			1	3	1		1	12.73	12.11	0.39	143	31.0513	366.667	24	74	9.85	116.7	153.8-145.8	148.6	147.8	153.8		113.32	226.32	5.165	16.43	18.9	23.56	2.27	140.4	380.21	360.98	380.89	398.76
2	145	50	23.7812	1		1							39	8	1			1	3	1		1	23.25	21.53	1.26	79	17.0873	62.6984	26	101	26.49	221.3	161.8-148.9	154.7	161.8	157.9		208.7	160.75	2.171	1.58	24.03	21.86	3.86	70.1	343.33	320.67	360.89	348.43
3	163	65	24.4646	1	1					1			28	6				1	3	1	1	0	11.02	10.23	0.37	188	27.6486	508.108	11	19	37.55	525	146.9-137.4	137.4	145.5	140.3		16.04	208.73	7.723	1.09	10.34	11.23	1.11	73	399.847	409.89	379.09	410.56
4	160	55	21.4844	1	1	1	1						27	6	1			1	3	1		1	14.2	12.67	0.68	267	18.6324	392.647	22	16	13.25	104	145-142	145	144.21	142		43.2	151.28	0.619	10.7	17.82	9.23	1.05	136.3	302.93	289.09	309.34	310.36
5	168	74	26.2188			1							23	6	1			1	3	1		0	15.97	14.88	0.54	109	27.5556	201.852	72	22	18.71	271.4	163.3-136.4	136.4	146.6	143.5		180.41	213.14	5.77	3.94	17.57	25.56	2.12	277.4	409.7	390.56	401.67	436.87
6	170	65	22.4913	1	1								17	8	1			1	3	1		1	8.85	7.37	0.74	138	9.95946	186.486	88	188	10.27	117.7	138.2-132.3	136.1	143.4	137.2		175.54	123.45	1.19	2.07	14.22	16.86	2.56	116.3	402.28	398.78	420.98	387.08
7	160	50	19.5312	1		1							19	6	1			1	1	1		0	10.22	7.96	1	222	7.96	222	49	26	31.3	270.3	140.2-138.3	139.8	138.3	140.2		73.7	97.63	0.702	1.01	23.63	6.06	1	390.7	282.583	289.98	267.43	290.34
8	173	55	18.3768	1	1	1							24	6	1		1		3	0		1	11.87	10.73	1.04	120	10.3173	115.385	25	10	16.32	176.5	144.5-149.4	149.4	151.6	144.5		2.87	1.77	0.317	1.67	29.2	14.41	2.26	136.2	144.657	134.56	178.43	120.98
9	145	45	21.4031			1	1						32	6	1			1	3	1	1	1	11.95	10.17	0.42	93	24.2143	221.429	39	41	27.38	160.1	162.5-152.4	152.4	159.72	162.5		8.91	51.11	0.244	4.39	21.34	10.34	1.34	153.7	381.657	380.98	387.54	376.45
10	170	65	22.4913	1	1	1	1		1				23	6				1	3	1		1	9.63	8.51	0.32	73	26.5938	228.125	22	17	8.16	79.5	137.6-142.1	137.6	139.8	141.4		65.94	257.58	0.911	8.61	28.78	13.43	1.45	260.1	302.997	287.89	300.98	320.12
11	168	65	23.03	1	1								19	8	1			1	3	1		1	8.31	4.69	2.33	104	2.01288	44.6352	8	23	53.01	600.7	135.6-124.1	134.2	135.6	135.4		34.34	40.49	2.952	2.59	35.8	4.46	1.98	288.8	337.633	320.56	333.56	358.78
12	163	65	24.4646	1	1	1	1						25	8	1			1	3	1		1	18.58	17.21	1.04	249	16.5481	239.423	73	212	20.83	259.8	152.6-148.3	148.3	149.3	152.6		150.4	439.5	5.654	16.43	55.28	32.73	1.86	142.4	315.363	345.67	290.65	309.77
13	160	60	23.4375		1	1		1					19	6	1			1	3	1		1	24.95	21.78	1.7	199	12.8118	117.059	15	25	20.4	223.5	145.1-143.7	143.7	144.2	145.1		110.6	11.7	0.764	50	35.6	23.4	1.25	102.6	358.443	389.45	365.76	320.12
14	173	75	25.0593	1	1		1						34	8	1			1	3	1		0	15.22	13.24	1.51	120	8.76821	79.4702	9	117	32.15	310.6	161.6-141.8	152.1	141.8	149		29.47	26.31	19.219	5.09	16.7	10.23	1.48	169.3	318.88	290.45	320.54	345.65
15	160	50	19.5312				1						23	6	1			1	1	1	1	0	21.03	19.81	0.76	117	26.0658	153.947	9	20	8.5	78	142.7-132.8	142.7	140.3	132.8		135.4	24.1	47.464	8.5	18.65	13.29	1.52	373.1	405.517	378.56	409.54	428.45
16	160	55	21.4844	1	1		1						18	6	1			1	3	1		1	2.82	2.19	0.54	112	4.05556	207.407	10	14	20.73	91.1	168.2-145.3	168.2	158.43	145.3		248.07	186.08	2.58	8.41	16.91	19.66	2.28	177.1	306.09	298.56	309.34	310.37
17	170	60	20.7612	1	1	1			1				38	8	1			1	3	1		1	7.09	6.66	0.24	117	27.75	487.5	234	427	23.12	218.1	146.2-138.79	140.55	141.78	146.02		87.61	456.7	12.45	5.43	43.23	32.54	9.73	86	449.33	480.76	420.45	446.78
18	161	70	27.0051	1	1	1	1						35	8	1			1	3	1		1	18.82	16.26	1.34	381	12.1343	284.328	7	18	30.01	660.6	167.1-131.9	132.1	135.9	167.1		50.18	43.77	1.279	4.17	23.29	18.34	18.78	512.1	307.64	332.4	289.54	300.98
19	148	40	18.2615	1								1	29	8	1			1	3	1		1	14.89	14.52	0.15	464	96.8	3093.33	18	22	28.61	225.3	145.3-141.3	142.4	145.3	142.4		92.01	65.33	12.466	41.58	20.57	26.75	9.32	157.7	332.487	390.45	308.45	298.56
20	165	60	22.0386	1	1	1							22	6	1			1	2	1		0	3.58	2.58	0.52	81	4.96154	155.769	28	31	8.67	107.2	147.6-139	139	141	143.9		69.38	564.35	43.533	0.94	14.01	14.29	5.81	194.6	242.83	250.65	210.34	267.5
21	152	48	20.7756		1	1							18	8	1			1	1	1		0	21.77	20.18	0.39	155	51.7436	397.436	150	215	9.44	109.4	137.8-134.4	134.4	135.79	135.7		158.82	105.48	20.428	30.66	35.5	25.21	3.95	213.3	392.917	390.54	378.65	409.56
22	183	60	17.9163	1	1		1						40	6	1			1	3	1	1	1	9.07	7.84	0.56	171	14	305.357	13	19	13.54	411.7	142.8-137.1	138.4	136.69	142.8		78.15	155.13	1.936	3.18	58.16	15.64	1.11	414.7	366.62	378.43	320.98	400.45
23	172	65	21.9713	1		1		1					28	8	1			1	3	1		1	45.33	42.56	0.73	38	58.3014	52.0548	2197	6378	31.19	517.4	137.1-130.67	130.67	132.56	137.1		211.53	694.5	12.29	3.51	17.85	28.37	5.95	536.9	338.257	378.45	290.45	345.87
24	165	60	22.0386		1								42	6	1			1	3	1		1	29.34	26.41	1.44	307	18.3403	213.194	25	38	34.11	212.1	158.75-135.75	135.86	140.2	158.75		74.96	54.09	3.013	3.81	29.29	36.65	13.28	337.4	388.027	409.54	378.45	376.09
25	170	70	24.2215	1		1		1					28	6	1			1	1	1		1	10.38	7.3	2.06	341	3.54369	165.534	22	29	10.41	70.2	148.9-139	145.4	144.2	148.9		19.1	25.68	0.07	0.76	27.42	39.52	1.51	148.3	491.84	509.98	489.09	476.45
26	150	55	24.4444									1	16	6	1			1	1	1		0	7.55	6.2	1.09	132	5.68807	121.101	27	33	20.59	167.5	148.3-147	147	147.6	148.3		15.03	22.16	0.186	1.5	23.8	25.24	1	461	354.943	378.09	365.76	320.98
27	155	55	22.8928	1		1							21	8	1			1	1	1		0	21.04	20.65	0.34	26	60.7353	76.4706	65	149	8.95	143.5	143.7-138.9	142.2	142.4	139.6		120.4	2446.74	34.548	15.25	27.66	35.65	5.3	255.8	495.937	490.54	520.87	476.4
28	160	50	19.5312	1		1							17	8	1			1	2	1		0	13.22	11.96	1.14	180	10.4912	157.895	16	117	9.66	286.8	144.8-131.7	131.7	136.3	135.4		69.46	1524.04	4.588	19.92	23.26	28.84	1.94	314.2	500.847	487.67	530.98	483.89
29	165	85	31.2213	1		1	1						20	8	1			1	1	1		0	11.2	8.87	1.7	80	5.21765	47.0588	54	168	15.32	201.2	139.8-132.4	132.4	136.4	138.9		6.62	49.24	0.117	0.88	21.63	54.44	3.13	215.4	399.14	430.98	389.9	376.54
30	162	35	13.3364	1			1	1					25	8	1			1	1	1	1	1	13.66	12.61	0.46	76	27.413	165.217	7	14	21.37	63.4	153.1-135.2	140.3	144.43	145.2		163.5	130.32	2.352	3.41	24.34	33.83	1.26	193.4	413.263	398.78	432.34	408.67
31	175	85	27.7551			1							42	8	1			1	3	1	1	1	12.55	11.43	0.41	208	27.878	507.317	101	103	12.65	74.6	164.6-143.2	153	164.6	143.2		226.47	652.55	25.358	2.76	20.47	18.14	2.17	148	407.507	390.56	420.98	410.98
32	150	53	23.5556	1		1							14	6	1			1	1	1		0	11.8	9.84	1.01	210	9.74257	207.921	11	16	9.72	59.2	145.6-141.4	141.4	144.19	143		88.82	137.36	0.945	1.27	14.37	8.88	1.08	365.6	289.737	289.09	278.67	301.45
33	164	75	27.8852		1	1							21	8	1			1	1	1		0	9.85	7.61	1.71	38	4.45029	22.2222	19	45	21.8	149.7	162.5-153.3	162.5	160	153.3		75.44	62.42	1.135	25.8	17.47	14.36	1.12	282	307.11	290.56	310.34	320.43
34	174	60	19.8177		1	1	1	1					17	8				1	1	1		0	19.72	18.48	0.67	98	27.5821	146.269	41	28	6.51	64.4	141.2-137.6	137.6	134.49	138		83.4	47.42	8.634	2	8.32	15.27	1.52	194	340.897	356.9	376.23	289.56
35	173	65	21.7181	1		1							32	8	1			1	1	1		1	13.78	12.83	0.73	181	17.5753	247.945	53	24	42.13	335.6	164.9-147.7	149.58	156.44	154.23		78.99	20.18	0.674	5.45	35.67	15.65	2.29	267.92	416.477	390.78	430.98	427.67
36	162	45	17.1468	1	1	1	1						26	6	1			1	3	1	1	1	30.6	28.83	1.29	170	22.3488	131.783	4	12	5.48	50.2	154.2-136.5	136.5	140.75	142.62		259.43	3420.15	2.898	2.67	13.52	37.37	5.4	130	306.103	290.43	309.43	318.45
37	160	70	27.3437	1									16	8	1			1	2	1		1	24.3	22.62	0.68	346	33.2647	508.824	543	1597	13.04	144.8	144.25-141.32	141.32	144.25	143.32		23.4	932.03	3.387	4.55	23.95	28.87	4.17	171.1	406.747	390.45	409.34	420.45
38	156	45	18.4911				1						20	6			1		1	0		0	12.77	11.51	0.84	190	13.7024	226.19	21	32	2.78	39.7	153.2-131.3	131.3	135.8	153.2		32.26	45.5	4.015	1.72	21.97	6.4	1.12	613.7	189.887	230.56	198.45	140.65
39	155	57	23.7253	1		1	1		1				19	6	1		1		3	0		0	7.04	5.29	1.37	74	3.86131	54.0146	43	33	8.1	87.1	142.2-134	134	141.7	142.2		8.49	1.65	20.621	15.71	15.86	17.88	2.26	276.3	189.77	190.34	168.54	210.43
40	160	65	25.3906	1	1		1						21	6	1		1		1	0		0	19.87	18.42	0.5	288	36.84	576	16	14	38.69	317	155.6-137.2	142.9	151.7	137.2		84.09	111.53	0.589	25.33	38.78	11.24	1.34	198.6	214.48	234.54	198.45	210.45
41	154	62	26.1427	1		1	1	1					27	8	1			1	3	1		1	31.64	29.46	1.36	173	21.6618	127.206	44	164	14.29	97.4	159.7-147.5	147.53	152.2	150.69		27.1	17.23	4.026	3.27	22.83	11.32	2.33	244.6	306.747	320.34	290.45	309.45
42	162	65	24.7676	1	1	1	1		1				16	8	1		1		1	0		0	18.51	16.58	0.81	168	20.4691	207.407	39	69	27.9	358.1	149.1-135.7	136.7	143.9	144.1		130.33	262.64	2.115	14.6	30.76	10.66	1.89	305.8	284.83	310.34	278.45	265.7
43	165	40	14.6924	1					1				20	8	1		1		1	0		1	8.93	8.13	0.42	272	19.3571	647.619	100	141	14.31	135.3	149.6-139.5	139.5	139.6	149.6		212.23	8520.12	31.42	4.24	12.33	42.2	2.16	187.6	184.48	209.34	189.45	154.65
44	160	45	17.5781	1	1	1	1						30	8	1			1	3	1		1	7.1	4.44	2.44	202	1.81967	82.7869	13	22	24.07	65.3	170.1-156.1	170.1	168	156.1		189.61	519.66	0.427	5.41	18.46	21.79	2.84	271.7	307.747	289.45	310.34	323.45
45	178	71	22.4088	1									28	8	1		1		3	0		0	15.47	13.87	0.4	495	34.675	1237.5	29	37	9.97	87.6	141.7-138.7	141.7	139.4	138.7		82.77	29.3	2.658	9.62	14.67	25.62	1.37	266.9	183.893	209.23	167.89	174.56
46	173	70	23.3887	1									28	8	1			1	3	1		1	25.14	24.31	0.45	169	54.0222	375.556	64	59	10.21	109.5	138.8-130.4	133.39	138.42	132.25		81.15	11360.5	24.567	11.18	26.14	48.82	3.72	93.8	446.25	390.45	457.87	490.43
47	150	45	20	1	1								17	6	1		1		3	1		1	32.22	30.13	1.1	243	27.3909	220.909	13	21	22.77	185.9	165-145.2	145.2	147	165		160.57	85.75	1.725	3.91	27.59	23.85	1.05	226.6	476.77	490.43	450.65	489.23
48	165	50	18.3655			1	1		1				20	6	1		1		1	1		0	23.6	20.65	1.75	292	11.8	166.857	8	9	8.03	95.6	145.4-138.5	138.5	144.9	142.1		147.18	180.41	6.641	2.31	10.89	1.67	1.04	252.2	128.177	130.43	143.54	110.56
49	161	60	23.1473	1		1	1						15	6	1		1		3	1		1	7.86	6.89	0.64	263	10.7656	410.938	39	41	7.97	60.2	149.5-140.3	137.4	136.1	149.5		10.77	12.98	0.069	3.86	16.78	32.34	1.87	119.2	121.88	109.54	123.45	132.65
50	152	60	25.9695	1	1	1							24	8	1			1	1	1		1	36.16	34.71	0.43	55	80.7209	127.907	68	88	19.8	273.9	150.5-135.1	135.1	138.9	150.5		134.58	7819.14	13.23	8.28	25.18	59.7	2.58	203.3	366.293	320.98	390.45	387.45
51	170	88	30.4498	1	1	1							27	6	1			1	3	0		0	9.41	8.26	0.72	162	11.4722	225	339	240	30.55	957.7	141.1-133.5	140.7	137.6	133.5		232.07	25288.2	42.368	0.89	22.34	27.87	2.8	176.6	470.133	489.54	420.43	500.43
52	156	65	26.7094	1		1		1	1				20	8	1		1		3	0		1	13.23	11.46	0.58	303	19.7586	522.414	40	29	11.99	72.3	152.9-135.2	135.2	139.5	152.9		54.74	22.37	1.202	6.1	18.12	25.53	1.83	135.3	193.763	210.32	190.54	180.43
53	173	65	21.7181		1	1		1					18	6	1		1		1	0		0	14.87	12.13	2.39	366	5.07531	153.138	52	94	26.96	237.4	141.4-140.4	141.4	140.9	140.4		11.89	129.66	26.84	0.37	27.86	35.72	2.03	345.4	386.067	390.43	400.34	367.43
54	170	75	25.9516	1									28	8	1			1	3	1	1	0	7.65	7.21	0.35	122	20.6	348.571	37	61	19.54	182	137.3-131.5	136.8	136.2	131.5		200.71	2680.54	11.494	13.98	25.95	33	4.48	156.9	443.697	430.23	490.43	410.43
55	160	70	27.3437	1	1	1	1						27	8	1			1	3	1		1	13.75	12.42	0.54	351	23	650	15	17	13.34	60.7	153.9-145.7	145.7	153.1	153.5		62.98	54.7	0.337	4.5	14.66	46.02	1.62	178.3	240.62	201.2	230.32	290.34
56	165	50	18.3655	1	1	1	1						34	8	1			1	3	1	1	1	9.57	8.61	0.43	169	20.0233	393.023	5	13	16.94	297.1	140.93-126.52	140.93	135.6	132.46		105.47	194.11	8.939	8.24	43.04	18.02	1.18	256.3	469.147	490.34	487.54	429.56
57	168	60	21.2585	1		1	1						24	8	1			1	3	1	1	1	1.33	0.99	0.24	165	4.125	687.5	1055	2951	19.67	261.3	138.4-136.5	131.83	133.35	133.69		165.36	19402.6	13.198	11.47	25	100	6.95	165	523.36	560.43	489.09	520.56
58	160	50	19.5312			1							30	8	1			1	3	1	1	0	28.82	27.75	0.58	98	47.8448	168.966	80	324	5.56	45.8	144-131.7	133.4	143.5	136.3		48.92	861.98	30.278	37.31	29.09	97.81	4.01	280.6	517.433	520.98	540.78	490.54
59	170	60	20.7612	1	1	1		1					29	8	1			1	3	1	1	1	13.83	12.81	0.68	94	18.8382	138.235	6087	15000	18.98	274.8	148.9-143.4	143.4	148.5	147.2		74.53	1081.66	1.359	50	28.82	100	13.27	532.9	553.177	590.54	578.43	490.56
60	165	60	22.0386	1			1						21	8	1			1	3	1		1	10.29	9.82	0.26	47	37.7692	180.769	2190	7457	10.61	175.2	165.1-136.4	136.4	143.4	158.3		48.79	277.81	28.835	45.09	45.67	87.65	7.95	288.8	486.767	500.98	490.76	468.56
61	165	55	20.202	1				1					20	6	1		1		1	0	1	0	3.82	2.92	0.52	112	5.61538	215.385	28	20	18.26	158.9	144.7-135.9	141.1	142.5	135.9		36.59	36.85	0.31	7.12	14.56	26.78	1.93	229.8	210.173	230.45	189.09	210.98
62	178	86	27.143	1		1			1				16	6	1		1		1	0		0	7.72	6.94	0.39	131	17.7949	335.897	30	35	7.62	125.2	142.5-140.6	140.6	142.5	142		41.13	15.81	15.872	0.87	10.4	11.48	1.69	290.4	181.333	200.23	167.43	176.34
63	170	65	22.4913			1			1				20	6	1		1		1	0		0	17.11	14.89	0.79	126	18.8481	159.494	10	24	14.32	100.4	140.5-135	137.4	135.55	136.6		120.97	58.97	3.241	0.91	8.81	8.59	2.03	157.4	124.833	110.43	134.98	129.09
64	162	60	22.8624						1				10	4	1			1	1	1		0	31.92	31.47	0.16	150	196.688	937.5	141	287	5.12	57.5	141.1-137.8	137.8	141.1	139.6		115.8	464.83	10.702	7.92	13.68	9.87	4.67	335.9	186.22	190.43	167.89	200.34
65	155	45	18.7305		1								21					1	1	1		0	16.79	15.43	0.4	108	38.575	270	37	29	5.79	53.5	146.4-141.2	142.1	142.6	141.2		135.01	97.48	7.053	8.13	11.23	13.21	1.08	221.4	382.54	390.54	389.54	367.54
66	170	70	24.2215			1							34	8	1			1	3	1	1	1	16.29	13.6	1.06	287	12.8302	270.755	1273	1405	18.22	367.3	146.9-135.96	138.17	144.9	140.8		143	1557.47	22.942	7.69	22.69	52.13	13.82	114.6	397.5	378.09	390.54	423.87
67	160	80	31.25	1	1								26	6	1		1		3	0		0	32.67	20.97	1.08	450	19.4167	416.667	16	93	15.32	180.4	151.7-136.1	144.2	141.7	136.1		140.17	69.26	17.054	3.63	21.34	18.56	1.24	145.6	319.13	345.98	320.98	290.43
68	171	55	18.8092			1							21	8	1			1	3	1		1	6.04	5.68	0.19	107	29.8947	563.158	42	176	9.31	74.7	156.8-137	137	141.9	156.8		256.31	200.79	12.834	8.28	34.56	58.76	2.06	315.9	416.947	390.54	430.87	429.43
69	170	70	24.2215						1				23	8	1			1	3	1	1	1	36.28	34.72	0.54	548	64.2963	1014.81	16	113	16.85	168.8	146.6-133	133	136.8	146.6		72.63	415	1.28	0.7	27.56	100	20	409.4	434.613	450.98	442.43	410.43
70	160	60	23.4375	1		1							29	6	1			1	2	1		0	11.82	10.77	0.66	145	16.3182	219.697	22	146	18.2	298.1	155.1-121.4	121.4	129	139.8		225.19	152.37	76.113	0.64	18.73	21.98	1.69	131.4	379.243	378.54	360.65	398.54
71	160	62	24.2187	1		1							21	8	1			1	1	1		0	22.69	21.03	0.93	87	22.6129	93.5484	12	14	8.7	97.4	139.8-132.8	132.8	135.2	139.8		56.35	9.52	22.902	2.82	11.69	14.37	1.66	518.2	281.62	290.43	286.45	267.98
72	150	62	27.5556		1								14	6	1			1	1	1		0	10.37	9.82	0.25	108	39.28	432	32	34	10.05	183.4	139.9-138.4	139.9	133.51	138.4		197.1	18966.6	89.304	21.59	22.29	41.15	1.93	191.7	425.947	390.54	430.54	456.76
73	160	45	17.5781			1	1						31	8	1			1	3	1		1	14.1	12.69	0.32	194	39.6562	606.25	19	44	5.22	52.7	143.3-132.2	134.4	138.8	141.4		32.46	65.63	0.568	6.83	7.17	59.02	1.65	166.8	306.953	290.98	309.43	320.45
74	170	53	18.3391	1	1	1	1						30	6	1		1		3	1		1	12.78	12.12	0.35	286	34.6286	817.143	22	16	8.96	76.8	148.5-141.98	143.44	142.37	142.12		180.21	3159.42	4.616	1.96	15.17	18.54	1.68	153.8	156.88	190.43	145.65	134.56
75	174	130	42.9383					1					32	8	1		1		3	1		1	12.07	11.26	0.37	112	30.4324	302.703	670	1268	13.59	212.5	144.11-134.94	139.01	141.11	139.44		100.5	99.94	42.209	1.82	13.33	36.13	11.92	124.9	315.177	290.54	320.43	334.56
76	168	65	23.03	1	1	1	1		1	1			17	6	1			1	3	1		1	11.18	10.39	0.16	20	64.9375	125	15	17	35.58	3889.9	134.4-125.91	127.01	133.89	131.88		104.81	369.68	46.051	7.77	29.64	34.24	1.2	467.4	430.317	390.54	430.54	469.87
77	163	46	17.3134			1							31	8	1		1		1	0		0	3.81	2.58	0.94	33	2.74468	35.1064	72	172	17.14	172.1	143.6-136.8	136.8	142.5	136		19.42	195.68	0.337	1.6	19.15	100	1.16	393.7	316.843	309.45	290.54	350.54
78	178	75	23.6713	1	1	1				1			35	6	1			1	1	1		0	7.79	7.42	0.28	80	26.5	285.714	9	31	19.2	330.8	142.7-136	136	139.5	140.9		238.78	25223.5	44.418	8.66	19.25	21.71	3.06	403.6	460.577	490.54	460.65	430.54
79	176	55	17.7557		1				1				18	8	1			1	1	1		1	12.43	11.09	0.86	9	12.8953	10.4651	32	35	13.28	44.2	152.65-144.32	144.32	148.45	152.65		83.03	261.22	1.25	8.99	14.41	29.36	2.21	268.6	218.14	209.43	210.45	234.54
80	174	55	18.1662			1			1				21	8	1			1	1	1		0	5.4	4.53	0.48	86	9.4375	179.167	39	55	7.28	84.1	138.46-129.97	129.97	131.85	138.46		43.43	392.46	0.264	4.51	20.4	100	2.25	283.3	344.687	345.65	367.87	320.54
81	160	50	19.5312						1				26	6	1			1	3	1		1	18.41	16.77	0.98	190	17.1122	193.878	50	73	9.56	54.9	144.98-135.78	135.78	135.84	144.98		75.23	27	6.28	25.05	8.55	24.38	1.03	133.2	136.43	120.43	134.54	154.32
82	170	55	19.0311	1									23	8	1			1	3	1		1	24.47	21.24	1.39	390	15.2806	280.576	35	26	6.48	154	141.4-129.77	141.4	133.68	133.6		216.35	1414.89	10.586	2.16	18.9	18.96	1.54	119.6	231.8	230.32	210.43	254.65
83	156	67	27.5312			1	1						27	6	1			1	3	1		1	14.63	13.34	0.78	243	17.1026	311.538	54	138	7.08	104.1	161.5-131.8	131.8	138.4	161.5		48.58	1681.3	26.83	16.11	8.38	40.43	5.03	222.1	325.133	345.43	320.43	309.54
84	178	90	28.4055	1		1	1			1			23	6	1			1	3	1		0	11.63	9.8	0.94	391	10.4255	415.957	13.6	14.9	14.17	154.02	145.4-135.9	135.9	145.1	141.5		75.7	25.67	20.49	1.84	23.36	10.39	3.3	387.3	323.17	320.43	350.54	298.54
85	175	70	22.8571	1			1						25	6	1			1	3	1		1	5.3	4.93	0.28	31	17.6071	110.714	33	29	11.3	73.6	158.6-141.3	141.3	144.28	158.6		146.33	97.76	9.02	0.73	13.85	26.06	3.93	166.3	264.17	290.43	245.65	256.43
86	170	60	20.7612	1	1	1	1						33	8	1			1	3	1	1	1	13.81	12.68	0.5	119	25.36	238	3276	5377	11.93	208.3	148.26-133.15	144.86	145.37	142.13		25.45	532.19	15.878	9.07	25.28	74.56	3.24	341.2	357.207	390.43	354.65	326.54
87	154	54	22.7694	1	1								43	8	1			1	3	1	1	1	7.33	6.38	0.4	137	15.95	342.5	40	83	20.99	365.5	157.66-128.97	149.29	155.62	142.93		227.62	906.81	22.345	9.62	25.76	76.89	1.56	128.2	350.647	365.64	365.76	320.54
88	164	75	27.8852			1				1		1	23	6	1		1		1	0	1	0	5.26	4.68	0.16	62	29.25	387.5	17	12	25.74	310	139.4-138.1	138.9	139.4	138.1		6.01	10.36	0.182	1.76	30.88	30.97	1.37	335.4	332.543	320.43	356.7	320.5
89	170	80	27.6817	1		1							41	8	1			1	3	1	1	1	22.35	20.74	0.94	115	22.0638	122.34	6598	10246	20.64	278.4	150.3-135.5	135.5	140.39	150.3		90.29	3295	4.434	50	25.55	56.21	19.45	204.3	368.243	378.54	345.65	380.54
90	178	50	15.7808	1		1							22	8	1		1		3	1		1	12.77	10.56	1.34	126	7.8806	94.0299	27	49	11.97	87.2	153.1-137	137	143.1	149.1		97.63	236.36	0.47	2.3	17.43	38.8	1.15	230.5	231.317	230.43	209.43	254.09
91	170	45	15.5709	1		1	1		1				31	6	1		1		1	0		0	9.32	7.59	0.63	281	12.0476	446.032	14	10	3.54	61.4	139.7-127.8	127.8	130.82	139.7		124.07	89.63	0.194	1.29	16.65	20.34	1	207.6	145.003	123.43	145.98	165.6
92	150	60	26.6667		1	1	1						27	6	1		1		1	0		0	15.52	13.26	1.57	143	8.44586	91.0828	1503	1374	32.71	321.7	142.4-139	142	142.4	139		9.01	24.31	0.382	6.18	14.62	28.93	3.3	385.8	185.54	190.43	156.76	209.43
93	155	45	18.7305		1								26	6	1			1	1	1		0	18.97	18.08	0.23	88	78.6087	382.609	111	62	5.48	46.4	141.4-135.7	135.7	141.4	139.6		93.45	38.61	5.97	8.13	10.3	20.83	2.1	231.1	203.137	200.34	210.53	198.54
94	160	70	27.3437	1	2	1	1		1				38	8	1			1	3	1		1	24.06	21.75	1.23	272	17.6829	221.138	34	27	22.33	211.8	166.5-143.2	166.5	162.7	143.2		210.82	543.95	0.28	6.95	16.78	36.54	3	178.1	306.8	320.43	290.43	309.54
95	158	45	18.026	1		1		1					42	8	1			1	3	1	1	1	8.08	6.85	0.76	78	9.01316	102.632	813	2279	25.75	266.1	154.31-133.21	133.21	142.97	149.22		22.52	1577.53	0.463	50	17.71	52.52	15.99	173.6	345.14	378.54	346.43	310.45
96	172	75	25.3515	1	1				1				32	8	1			1	3	1		0	14.05	13.83	0.11	127	125.727	1154.55	330	769	15.35	168.8	150.6-134.5	134.5	143.2	147.8		215.99	36619.9	56.941	29.14	24.89	51.5	7.63	214.8	418.51	390.43	435.54	429.56
97	185	85	24.8356	1	1	1			1	1			20	6	1			1	3	1	1	1	9.77	8.27	0.59	87	14.0169	147.458	22	21	12.74	329.3	143.61-127.8	130.79	128.6	143.61		58.49	169.47	0.856	4.61	16.78	23.43	3.46	176.7	218.13	209.43	210.4	234.56
98	150	45	20	1	1	1	1		1				19	8	1			1	1	1		1	6.06	4.85	0.9	71	5.38889	78.8889	10	24	10.98	93.4	138.6-127.1	138.6	132.56	127.1		24.24	113.01	1.874	4.03	18.2	95.61	2.9	143.3	328.593	320.43	356.76	308.59
99	170	55	19.0311			1				1			19	6	1		1		2	1		0	6.37	5.06	1.01	79	5.0099	78.2178	6	16	21.95	108.3	146.5-142.97	142.97	144.08	146.5		34.97	81.54	1.932	4.5	31.24	24.79	1.04	265.4	364.77	390.43	378.45	325.43
100	165	72	26.4463	1	1			1					18	6	1		1		3	0		0	15.05	13.33	0.8	275	16.6625	343.75	3	18	14.13	226.4	153.1-144.4	144.4	151.2	149.4		20.29	19.7	8.521	3.34	14.56	25.78	5.44	93.4	306.733	309.32	290.45	320.43
101	150	33	14.6667			1							32	6	1			1	1	1		0	8.74	6.33	1.61	87	3.93168	54.0373	51.1	46.2	7.82	63.46	143-134.1	134.1	143	140.1		84.5	60.24	4.85	3.78	17.67	32.89	1.89	301.1	316.82	290.43	345.65	314.38
102	163	57	21.4536	1						1			15				1		1	0		0	7.5	6	0.71	136	8.4507	191.549	59	210	14.71	677	139.8-133.3	134.7	132.75	137.1		12.57	10.51	2.598	0.48	64.4	15.9	1.49	420.1	292.103	290.34	276.54	309.43
103	158	65	26.0375	1	1								31	8	1			1	3	1	1	1	13.49	11.88	0.85	128	13.9765	150.588	685	529	11.27	145	146.51-133.35	133.35	142.36	146.52		123.45	345.67	15.99	4.21	26.65	74.53	10.2	103	344.467	320.43	345.43	367.54
104	167	70	25.0995	1	1	1	1						25	8	1			1	3	1		0	5.94	5.2	0.53	224	9.81132	422.642	28	26	7.88	63.1	153.5-136.4	136.4	144.2	153.5		24.52	51.46	0.275	0.87	18.74	22.19	1.49	198.7	318.4	290.34	310.32	354.54
105	160	70	27.3437	1		1	1		1	1			27	6	1			1	3	1		1	7.82	6.47	0.64	214	10.1094	334.375	13	19	14.78	207.2	148.4-143.9	144.1	143.9	148.4		37.73	151.99	1.58	0.87	16.29	25.99	1.6	460.1	349.703	320.34	378.45	350.32
106	170	60	20.7612	1		1			1				28	8	1			1	3	1		0	11.82	11.34	0.37	86	30.6486	232.432	19	27	15.27	195.7	160.8-135.5	135.5	137.2	160.8		184.56	126.46	1.318	2.16	14.79	29.49	6.55	103	300.703	290.34	301.32	310.45
107	160	60	23.4375	1		1				1			29	6	1			1	2	1		0	11.82	10.77	0.66	145	16.3182	219.697	22	146	18.2	298.1	155.1-121.4	121.4	129	139.8		225.19	152.37	76.113	0.64	18.73	21.98	1.69	131.4	300.837	289.43	302.69	310.39
108	160	62	24.2187	1	1	1	1						21	8	1			1	1	1		0	22.69	21.03	0.93	87	22.6129	93.5484	12	14	8.7	97.4	139.8-132.8	132.8	135.2	139.8		56.35	9.52	22.902	2.82	11.69	18.32	1.66	518.2	373.74	320.32	410.45	390.45
109	155	50	20.8117			1	1						21	6	1		1		1	0		0	3.48	1.89	1.39	112	1.35971	80.5755	20	39	3.77	48.6	142.9-128.2	131.3	142.9	128.2		27.26	20	39	1.81	12.33	14.13	1.15	340.5	307.473	293.56	320.43	308.43
110	168	65	23.03	1			1		1				35	8	1			1	3	1		1	6.3	5.97	0.16	236	37.3125	1475	6	14	30.58	433.7	151.1-145.5	145.5	148.5	151.1		36.04	102.69	1.445	3.95	22.1	23.08	1	125.2	216.733	210.32	230.43	209.45
111	176	78	25.1808	1		1							40	8	1			1	2	1	1	1	6.58	5.75	0.77	130	7.46753	168.831	354	904	32.98	672	147.5-133.9	135.5	147.5	140		12.36	34.13	1.133	13.08	24.47	19.25	1.8	196.4	268.437	234.54	290.34	280.43
112	167	65	23.3067										14	6	1			1	1	1		0	24.28	22.26	0.68	182	32.7353	267.647	17	27	5.58	66.5	145.3-142	145.3	144.3	142		158.73	1043.61	53.485	50	18.29	15.53	1.66	260.4	420.377	390.43	430.43	440.27
113	162	60	22.8624										23	6	1			1	1	1		0	12.26	11.75	0.43	106	27.3256	246.512	60	82	5.99	83.3	143.6-136	142.3	143.6	136		138.98	23943.1	68.95	18.99	15.71	19.69	2.05	167.2	451.88	409.43	456.78	489.43
114	158	60	24.0346		1	1							22	6	1			1	3	1		1	10.63	9.47	0.86	109	11.0116	126.744	14	35	15.72	106	148.9-140.6	140.6	142.2	148.9		156.9	249.23	6.836	4.49	16.89	11.65	1.67	144.8	382.777	390.43	389.45	368.45
115	168	60	21.2585			1	1						26	6	1			1	1	1		0	5.9	4.68	0.81	143	5.77778	176.543	18	34	20	179.6	140.08-127.15	128.55	128.92	140.08		80.29	526.44	0.588	1.02	14.55	19.4	1.06	172.1	213.37	209.43	210.34	220.34
116	173	70	23.3887	1				1					23	8	1			1	3	1		0	15.92	14.31	0.65	201	22.0154	309.231	535	1066	17.45	350	154.87-122.18	122.18	133.59	146.14		126.23	582.44	18.005	0.96	26.05	22.47	1.06	159.7	323.467	320.43	359.43	290.54
117	172	50	16.901	1		1	1		1				31	6	1		1		1	0		0	9	7.44	0.58	150	12.8276	258.621	37	34	10.44	95.9	138.97-135.89	137.86	136.88	135.89		30.23	12.11	0.453	2.17	14.56	15.23	1.23	147.9	203.073	209.32	210.45	189.45
118	156	40	16.4366	1	1	1							20	6	1		1		1	0		0	9.41	8.36	0.7	95	11.9429	135.714	26	29	8.01	70.3	140.69-133.6	133.6	134.74	137.02		88.36	41.36	11.142	4.6	22.47	15.33	1	402.6	304.037	290.43	310.34	311.34
119	160	45	17.5781	1					1				27	6	1			1	3	1		0	20.12	16.58	2.49	239	6.65863	95.9839	17	14	13.51	158.1	155.6-132.4	144.7	145.8	132.4		95.39	4394.35	42.525	2.37	20.81	31.48	4.37	118.5	416.057	380.43	423.45	444.29
120	175	55	17.9592		1	1							18	8	1			1	3	1		1	0.86	0.69	0.13	332	5.30769	2553.85	35	54	12.09	138.3	144.8-138.8	138.8	144.8	140.7		214.29	40000	27.149	7.69	19.93	29.62	2.62	286	439.46	409.43	430.41	478.54
121	182	75	22.6422			1	1			1			34	8	1			1	3	1		1	7.99	7.36	0.4	49	18.4	122.5	38	105	26.39	380.8	131.11-128.13	128.3	130.43	131.11		221	234.56	12.65	5.08	29.85	26.27	3.47	208.6	326.807	309.43	320.43	350.56
122	165	80	29.3848	1	1								28	6	1			1	1	1		0	15.53	13.05	1.85	187	7.05405	101.081	13	18	9.61	70.3	142.7-137.5	142.7	137.5	142.3		19.58	342.89	65.93	3.256	22	15.13	16.79	1.41	355.873	320.43	356.76	390.43
123	160	51	19.9219	1			1						22	6	1		1		1	0		0	22.42	21.03	0.58	143	36.2586	246.552	37	21	6.13	62.5	143.6-138.1	143.6	138.1	139.6		139.36	18.16	39.481	7.65	10.47	11.34	1.27	329.5	303.473	290.32	310.32	309.78
124	150	55	24.4444										24	8	1			1	3	1	1	1	22.04	20.65	0.66	35	31.2879	53.0303	40	35	29.68	408.2	151.6-137.7	137.7	144.8	151.6		195.4	644.12	37.504	15.38	19.77	21.81	1.97	127.8	418.147	423.45	440.54	390.45
125	165	50	18.3655		1		1						28	8	1		1		1	0		0	18.71	17.85	0.49	138	36.4286	281.633	3	6	53.31	655.4		131.02-120.8	129.4	131.02		61.77	68.11	2.919	3.11	32.57	13.26	1.28	374.4	328.873	309.43	320.43	356.76
126	156	45	18.4911		1								13	6	1		1		3	0		0	11.7	10.99	0.5	262	21.98	524	14.4	23	5.81	37.6	144.2-135.5	138.2	137.2	142.7		57.35	16	0.225	0.95	19.28	14.55	1	455.3	245.067	290.32	210.32	234.56
127	167	65	23.3067				1						23	6	1			1	3	1		1	1.45	0.91	0.5	36	1.82	72	155	536	6.82	85.4	136.4-127.18	127.18	130.64	135.09		7.02	178.35	0.419	22.23	16.54	58.7	1.26	167.9	170.8	190.32	145.65	176.43
128	149	63	28.3771	1		1							20	8	1			1	3	1	1	1	6.09	5.66	0.32	152	17.6875	475	181	312	5.54	87.6	149.87-132.52	138.96	138.3	145.75		34.38	23.34	1.686	9.31	27.26	27.35	1.46	354.5	344.36	320.32	345.67	367.09
129	172	80	27.0416				1		1				23	6	1			1	3	1		0	8.22	6.89	0.84	92	8.20238	109.524	18	32	5.79	166.6	151.7-134.5	134.5	148.3	151.7		220.3	40000	27.956	2.72	23.98	13.18	3.31	265.9	374.76	389.43	345.76	389.09
130	158	50	20.0288	1	1								39	6	1			1	3	1		1	26.91	21.34	1.91	113	11.1728	59.1623	35	60	10.24	69	158.8-131.4	131.4	149.4	155		45.93	49.16	1.945	0.84	16.33	32.33	1	385.9	318.503	289.43	320.43	345.65
131	155	55	22.8928	1			1						22	6	1		1		3	0		0	13.88	11.71	1.11	255	10.5495	229.73	82	52	2.88	48.1	146.9-141.3	141.3	141.4	146.9		42.78	83.23	0.131	1.07	13.75	7.82	1.15	249.3	144.43	120.32	134.54	178.43
132	160	50	19.5312			1	1						22				1		1	0		0	7.01	5.53	0.97	109	5.70103	112.371	19	15	19.87	80.1	169-137.4	169	163	137.4		28.8	63.57	0.131	4.01	15.29	21.06	1.79	377.8	178.687	145.65	189.43	200.98
133	174	100	33.0295	1				1					25	6	1			1	3	1		1	14.83	13.2	1.02	231	12.9412	226.471	24	19	8.69	62.9	153.1-141.7	143.5	145.4	153.1		18.65	11.98	0.245	0.53	17.31	85.48	1.11	207.3	318.65	290.43	320.43	345.09
134	175	75	24.4898	1						1			18	4	1		1		1	0		0	11.92	11.09	0.6	112	18.4833	186.667	26	35	10.98	140.6	142.9-135	135	137.3	138.6		107.69	53.98	3.158	1.41	14.86	13.83	1.64	177.8	165.277	190.32	160.43	145.08
135	165	80	29.3848	1	1								22	8	1			1	3	1		1	7.4	5.69	1.37	128	4.15328	93.4307	31	34	11.94	151.1	159.9-140.8	140.8	148.9	159.9		84.19	12.67	0.261	1.61	20.34	23.41	1.44	102.9	320.287	309.32	320.98	330.56
136	155	40	16.6493	1	1	1	1						18	8	1		1		1	0		0	10.4	9.22	0.83	157	11.1084	189.157	11	31	19.51	133.1	162.9-145.5	162.9	149.5	145.5		18.59	63.31	0.689	38.28	19.9	36.64	1.92	239.1	217.983	209.32	234.54	210.09
137	160	60	23.4375				1						43	8	1			1	3	1		1	15.01	13.07	1.35	173	9.68148	128.148	24	28	60.11	330.2	164.5-145.8	145.8	150.2	153.6		92.2	929.23	10.32	6.95	25.33	45.44	145.65	91.5	439.733	430.43	478.43	410.34
138	170	45	15.5709	1			1						22	6	1			1	1	1		0	2.14	1.95	0.15	55	13	366.667	85	61	19.84	316.3	158.2-147	147	147.2	152.3		248.25	276.53	101.006	50	23.5	12.5	2.35	338.1	510.133	490.54	509.43	530.43
139	180	75	23.1481	1	1		1		1				38	8	1			1	3	1	1	1	12.54	11.95	0.43	120	27.7907	279.07	20	34	34.02	632.6	148.4-142.4	148.4	142.4	143.1		118.74	210.7	0.023	1.83	40.03	27.61	1.14	186.9	306.8	320.43	309.43	290.54
140	158	65	26.0375			1	1						23	6	1			1	1	1		1	1.86	0.53	0.33	37	1.60606	112.121	66	262	11.39	140	152.2-141.8	141.8	143	152.2		0.75	34.99	0.206	4.15	14.18	48.27	2.01	197.9	348.473	390.43	345.65	309.34
141	167	50	17.9282	1	1	1				1			26	6	1			1	1	1		0	17.06	15.49	0.75	122	20.6533	162.667	21	39	20.57	276.8	142.5-139.8	141.5	142.5	142		145.46	4707.27	57.019	3.57	22.59	23.4	2.74	344.6	459.54	489.43	432.43	456.76
142	165	50	18.3655				1						22	6	1		1		1	0		0	10.57	9.67	0.47	191	20.5745	406.383	25	36	17.66	124.9	153.5-141.2	141.2	142.5	153.5		185.89	249.76	6.423	9.46	42.89	34.8	1.54	216.1	300.06	320.21	290.43	289.54
143	168	75	26.5731			1				1			25	8	1			1	3	1		1	4.42	3.93	0.27	66	14.5556	244.444	67	105	14.24	238.2	148.6-138.8	143.5	142.5	148.6		210.99	390.74	2.291	7.58	24.45	25.99	1	165.5	355.65	356.09	390.43	320.43
144	167	65	23.3067	1	1	1		1	1				27	8	1			1	3	1		1	15.07	12.36	1.73	115	7.14451	66.474	27	23	11.5	79.9	162.4-146.9	152.1	162	151.3		98.29	480.63	0.457	3.93	26.65	23.78	1.25	125.8	321.083	309.43	320.32	333.498
145	168	50	17.7154	1	1	1	1						23	6	1			1	3	1	1	0	21.03	19.98	0.59	291	33.8644	493.22	80	75	54.79	491.3	145.4-136.5	136.5	145.4	138.6		110.25	16.17	24.304	1.48	18.89	17.65	1.14	223.7	335.43	309.43	376.43	320.43
146	164	55	20.4491	1		1				1			22	8	1			1	3	1	1	1	0.15	0.01	0.12	60	0.0833333	500	13	22	43.59	615	150.1-135	144.2	148.4	144.2		203.05	13970.9	109.636	3.72	33.79	26.37	1.65	244	513.06	509.43	540.32	489.43
147	175	55	17.9592		1	1	1						17	6				1	1	1		0	3.91	1.99	1.41	101	1.41135	71.6312	10	18	9.07	86.8	146-138.3	146	145.3	138.3		50.55	35.43	23.521	0.95	16.56	16.33	1.28	426.4	410.4	390.43	430.43	410.34
148	168	100	35.4308	1	1					1			22	6	1		1		1	0	1	0	14.06	12.09	1.28	96	9.44531	75	19	11	29	774.7	137.4-133.4	133.4	135.9	137.4		72.08	43.72	45.315	1	61.38	14.97	1	355.4	471.203	468.09	489.43	456.09
149	165	65	23.8751	1		1	1						29	6	1			1	3	1		1	17.39	15.62	0.75	87	20.8267	116	1239	6491	18.36	252.9	139.13-117.97	117.97	123.37	139.13		16.56	156.02	39.917	6.01	20.28	23.06	4.01	130.8	426.097	390.43	467.43	420.43
150	175	90	29.3878	1	1	1							19	8	1			1	1	1		0	14.95	12.51	1.02	198	12.2647	194.118	234	81	18.79	113.4	153.5-145.6	151.5	153.5	145.6		14.79	22.15	0.236	3.44	16.66	14.41	2.65	290.5	302.387	290.32	310.3	306.54
151	155	60	24.974	1			1						33	6	1			1	3	1		1	5.81	5.31	0.28	75	18.9643	267.857	32	55	13.47	92	157.6-142.9	142.9	149.2	157.6		196.81	79.32	2.077	5.11	17.53	17.8	6.92	496.9	235.873	290.32	210.32	206.98
152	150	45	20			1				1			20	6	1			1	3	1		1	3.38	2.83	0.48	131	5.89583	272.917	28	27	19.16	208.8	152.9-141	141	143.9	141.2		5.69	4.39	0.103	0.61	21.41	16.61	1.03	127.7	333.17	323.43	356.76	319.32
153	170	60	20.7612										10		1			1	1	1		0	8.82	7.77	0.7	125	11.1	178.571	549	731	8.04	55.9	140.8-136.4	140.8	136.4	139.8		88.51	4960.08	30.114	7.64	23.54	20.43	3.11	349.4	395.727	390.43	387.43	409.32
154	158	60	24.0346	1	1		1						32	8	1			1	3	1	1	1	14.76	14.21	0.32	48	44.4062	150	17	29	8.64	86.7	153.8-147.7	147.7	151.1	153.8		241.87	244.73	44.657	50	45.75	23.98	3.36	98.8	483.317	490.43	478.43	481.09
155	176	72	23.2438						1				15	6	1			1	3	1		0	6.41	5.35	0.78	87	6.85897	111.538	17	42	3.49	58.5	141.9-117.1	117.1	125.9	137.2		134.97	2095.72	24.135	2.77	18.1	14.41	2.47	161	362.733	389.43	320.34	378.43
156	172	90	30.4218					1					19	6	1		1		3	0		0	22.83	20.68	0.8	183	25.85	228.75	36	28	7.15	173	141.8-131.6	131.6	134.9	135.2		258.53	582.26	30.524	1.32	14.4	33.63	2.7	312.7	323.243	290.32	320.32	359.09
157	158	66	26.4381	1		1	1						28	8	1			1	3	1		1	11.07	8.15	2.37	62	3.43882	26.1603	786	11898	7.6	95	178.94-128.99	178.94	160.64	171.44		256.8	60.87	6.917	50	66.39	100	20	477.9	465.983	490.43	429.43	478.09
158	160	50	19.5312	1		1	1						16	6	1			1	3	1	1		19.23	16.88	1.08	242	15.6296	224.074	23	20	4.2	55.6	144.6-136.5	136.5	139.6	138.3		180.27	144.86	0.649	2.9	17.45	17.05	1.36	192.6	220.763	209.32	218.43	234.54
159	178	70	22.0932	1		1		1		1			29	6	1			1	1	0	1	0	13.08	11.85	0.69	143	17.1739	207.246	13	22	25.34	369.4	138.1-134	134	134	135.4		152.39	53.37	38.599	19.36	37.99	9.69	1.54	166	469.393	490.43	430.32	487.43
160	150	55	24.4444		1	1	1						16	8	1			1	3	1		1	11.73	10.78	0.46	174	23.4348	378.261	11	15	24.58	149.8	171-140.4	140.4	161.48	171		5.96	13.5	0.05	0.67	14.22	13.57	4	189.9	175.177	190.23	167.98	167.32
161	181	65	19.8407			1							15	6	1			1	1	1		0	8.92	7.54	0.73	259	10.3288	354.795	39	84	17.61	141.3	149.3-138.9	141.7	146.63	138.9		67.05	30.87	3.382	5.36	13.45	15.78	2.34	310.8	225.137	210.09	220.23	245.09
162	164	57	21.1927			1			1				33	8	1			1	3	1		0	22.45	20.32	0.54	322	37.6296	596.296	10	19	11.31	72.3	154-137.8	144.5	150.85	137.8		106.9	1891.05	14.167	2.9	17.32	18.56	2.76	283.3	358.167	320.09	378.98	375.43
163	165	65	23.8751	1	1		1						24	8	1			1	3	1	1	1	19.34	17.66	0.7	106	25.2286	151.429	26	30	28.56	357.9	167.1-137.5	167.1	142.1	140.8		179.79	1408.69	22.219	50	35.67	27.47	1.49	120.9	432.43	390.43	430.43	476.43
164	160	45	17.5781	1	1	1							39	8	1			1	3	1		1	25.18	23.95	0.33	300	72.5758	909.091	7	18	22.91	273.8	148.2-136.6	136	140.9	144.8		259.15	537.26	96.48	44.5	52.79	60.91	3.58	379.3	469.393	490.43	467.32	450.43
165	143	60	29.3413	1	1	1				1			26	8	1			1	1	1		1	14.74	12.65	1.5	500	8.43333	333.333	34	48	41.99	964.2	143.01-131.74	140.85	139.47	134.14		270.7	2496.02	30.369	50	35.23	28.79	13.97	225.5	415.687	390.43	435.65	420.98
166	170	90	31.1419	1	1					1			20	6	1			1	2	1		0	13.77	11.88	0.96	303	12.375	315.625	6	7	34.86	425.8	154.2-141	141	151.5	141.7		109.2	135.19	6.747	14.93	25.46	10.94	1	319.5	315.103	290.32	320.43	334.56
167	178	75	23.6713			1							20	8	1			1	1	1		0	7.68	7.1	0.25	147	28.4	588	89	123	35.08	239.6	152.2-139.3	142.8	139.3	143.1		204.11	497.94	1.384	12.33	26.57	33.01	1.74	81.8	259.983	278.09	267.32	234.54
168	162	80	30.4832	1	1	1				1			23	6	1		1		1	0		0	4.01	3.08	0.44	64	7	145.455	18	17	17.44	419.6	142.7-139.7	139.8	139.7	142.7		86.93	57.42	0.376	3.18	35.11	13.4	1	108.9	307.183	320.98	310.23	290.34
169	170	70	24.2215	1			1			1			28	6	1			1	3	1		1	10.77	7.75	1.4	67	5.53571	47.8571	8	10	10.49	157.1	155.2-148.2	155.2	152.6	151.1		218.13	2163.82	2.577	3.13	21.63	16.91	2.96	234	313.137	309.09	320.09	310.23
170	170	60	20.7612	1		1							15	6	1			1	3	1		1	16.11	15.06	0.43	163	35.0233	379.07	22	23	15.59	72.5	149-144.7	144.7	143.3	149		101.89	2259.65	10.327	14.84	17.04	15.68	2.53	97.1	292.623	290.32	278.43	309.12
171	163	45	16.937		1	1	1						22	6	1			1	3	1		0	6.34	5.17	0.62	190	8.33871	306.452	6	14	16.85	108.9	158.4-132.3	132.3	148.9	158.4		120.87	48.75	15.467	3.36	19.63	16.93	2.71	344.6	325.177	320.23	345.54	309.76
172	165	50	18.3655	1	1	1				1			27	6	1		1		2	0		0	11.48	10.22	0.8	258	12.775	322.5	6	14	14.79	143.3	148-142.4	142.4	148	145.8		77.74	130.32	16.233	1.56	19.99	11.7	1.11	102.8	270.733	290.32	287.34	234.54
173	160	55	21.4844		1	1							34	8	1			1	3	1		1	11.23	10.41	0.3	199	34.7	663.333	74	201	29.75	218	156.4-143.4	143.4	150.4	155.8		217.39	3514.82	8.237	17.06	17.02	21.59	3.24	237.7	321.62	320.09	310.23	334.54
174	180	90	27.7778	1	1	1							37	8	1			1	3	1		1	20.68	16.54	3.37	242	4.90801	71.8101	84	71	21.65	372.7	162.81-147.57	147.57	152.58	162.81		8.38	329.42	5.832	50	18.7	19.11	2.96	232.1	354.963	387.43	367.23	310.23
175	160	50	19.5312	1	1				1				20	8	1			1	1	1		1	3.53	2.83	0.63	26	4.49206	41.2698	26	106	36.31	338.7	150.7-131.03	131.03	133.3	150.7		155.54	53.33	2.434	18.11	26.63	33.06	1	264.1	340.87	345.54	320.98	356.09
176	150	45	20		1	1							24	6	1			1	3	1		0	20.24	14.69	4.07	284	3.60934	69.7789	22	21	7.41	89.9	147.7-139.1	139.1	139.3	143.9		27.99	76.43	1.208	4.6	10.83	29.62	1.46	380.2	244.657	210.23	245.65	278.09
177	160	75	29.2969		1								19	8	1			1	1	1		0	17	15.45	1.14	42	13.5526	36.8421	686	1647	12.13	156.8	141.1-132.3	132.3	131.4	138.2		241.41	126.37	59.297	50	18.96	17.7	8.55	242.8	351.697	320.32	378.32	356.45
178	175	70	22.8571						1	1			20	8	1			1	1	1		0	19.74	18.34	0.79	195	23.2152	246.835	10	31	20.47	469.1	160.7-134.2	134.2	139.4	139		250.34	1957.17	100	12.69	21.81	92.26	4.71	332.9	466.17	450.32	467.87	480.32
179	148	45	20.5442				1	1	1				20	8	1			1	3	1		1	3.06	2.62	0.41	167	6.39024	407.317	11	38	18.82	203.8	156.92-131.85	133.83	136.88	156.92		294.58	3295.81	47.59	2.12	18.63	24.77	2.46	123.2	416.4	390.43	430.43	428.34
180	163	65	24.4646		1		1						23	8	1		1		1	0		0	15.59	14.02	1.03	281	13.6117	272.816	13	42	38.61	556.4	165.1-136.8	165.1	136.8	157.4		106.16	226.1	4.264	50	21.79	16.65	1.99	195.1	371.317	390.43	378.43	345.09
181	165	55	20.202		1		1						20	6	1			1	1	1		0	26.4	24.5	0.92	498	26.6304	541.304	28	21	4.96	50.1	154.5-139.3	139.3	154.5	139.1		278.09	254.19	0.479	2.02	20.19	20.3	4.6	195.6	235.74	209.23	230.12	267.87
182	159	45	17.7999		1					1			26	6	1			1	1	1		0	7.49	6.74	0.26	43	25.9231	165.385	15	17	30.6	240	144.8-137.3	139.1	137.3	140.4		100.81	13.68	9.416	12.33	17.63	13.53	1.84	244.8	325.037	320.23	309.23	345.65
183	162	48	18.2899						1				20	6	1			1	1	1		0	22.25	20.98	0.6	82	34.9667	136.667	14	25	9.34	107.7	143.9-138.5	143.9	141.2	138.5		116.12	106.62	51.765	31.75	21.97	21.26	1.09	363.6	363.103	390.43	320.34	378.54
184	155	45	18.7305		1								35	6	1			1	1	1		0	16.63	16.01	0.27	105	59.2963	388.889	19	25	7.22	50.4	145.6-140.8	140.8	144.07	142.78		278	18.96	5.719	6.38	16.56	18.57	1.19	293.7	303.037	289.45	309.32	310.34
185	165	65	23.8751	1		1							21	6	1			1	1	1	1	0	21.04	20.26	0.34	26	59.5882	76.4706	65	149	8.95	143.5	143.7-138.9	142.4	142.4	139.6		144.29	2446.74	34.548	15.25	27.66	35.65	5.3	255.8	385.1	378.09	367.98	409.23
186	160	50	19.5312	1		1						1	23	8	1			1	1	1		0	18.62	13.69	2.35	208	5.82553	88.5106	16	117	9.66	286.8	144.8-132.5	132.5	136.3	135.4		175.04	1524.04	4.588	19.92	23.26	28.84	1.94	314.2	329.85	309.23	329.78	350.54
187	165	85	31.2213	1		1	1						20	6	1			1	1	1		0	11.2	8.87	1.7	80	5.21765	47.0588	54	168	15.32	201.2	139.8-132.4	132.4	136.4	138.9		6.26	49.24	0.117	0.88	21.63	54.44	3.12	215.4	347.323	387.54	345.65	308.78
188	150	53	23.5556	1		1	1						14	4	1			1	1	1		0	11.8	9.84	1.01	210	9.74257	207.921	11	16	9.72	59.2	145.6-141.4	141.4	145.6	143		88.82	137.36	0.945	1.27	14.27	8.88	1.08	365.6	247.733	210.32	234.54	298.34
189	164	75	27.8852		1	1						1	21	6	1			1	1	1		0	9.85	7.61	1.71	38	4.45029	22.2222	19	45	21.8	149.7	162.5-153.3	162.5	160	153.3		75.44	62.42	1.135	25.8	17.47	14.36	1.12	282	279.933	209.34	309.23	321.23
190	164	60	22.3081	1				1				1	29	8	1			1	1	1		0	5.09	4.18	0.7	63	5.97143	90	58	30	15.15	71	147.1-140.3	141.9	137.65	147.1		0.29	125.58	0.051	2.54	16.43	22.83	2.05	459.5	306.96	320.34	310.2	290.34
191	178	71	22.4088	1			1						28	8	1		1		3	0		0	15.47	13.83	0.4	495	34.575	1237.5	29	37	9.97	87.6	141.42-135.64	141.28	141.42	135.64		82.77	29.3	2.658	9.62	14.89	13.98	1.37	266.9	170.37	209.34	178.34	123.43
192	172	70	23.6614	1	1		1			1		1	21	6	1			1	1	1	1	0	11.34	10.53	0.39	199	27	510.256	9	10	58.07	1160.3	157.8-134.3	143.9	157.8	136.5		98.58	58.06	0.823	4.2	41.66	10.52	1	146.3	332.79	320.3	367.09	310.98
193	152	60	25.9695	1	1	1							24	8	1			1	3	1		1	36.16	34.71	0.43	55	80.7209	127.907	68	88	19.8	273.9	150.5-135.1	135.1	138.9	150.5		134.58	7819.14	13.23	8.28	25.18	59.7	2.58	454.6	351.62	367.43	320.34	367.09
194	155	60	24.974	1	1	1	1			1			24	8	1			1	3	1		1	22.66	21.12	0.52	40	40.6154	76.9231	13	49	29.38	232.2	151.14-127.44	127.44	137.66	149.9		169.25	1502.03	12.031	14.65	49.02	33.91	2.15	302	339.403	320.34	330.78	367.09
195	165	50	18.3655	1	1	1							34	8	1			1	3	1	1	1	9.57	8.61	0.43	169	20.0233	393.023	5	13	16.94	297.1	140.93-126.43	140.93	135.6	132.46		105.47	194.11	8.939	8.24	43.04	18.02	1.18	256.3	336.583	290.34	340.98	378.43
196	165	60	22.0386	1			1						21	6	1			1	3	1		1	10.29	9.82	0.26	47	37.7692	180.769	2190	7457	10.61	175.2	165.1-136.4	136.4	143.4	158.3		48.79	277.81	28.835	45.09	36.78	25.65	7.95	288.8	413.62	430.34	390.43	420.09
197	178	86	27.143	1		1			1				16	6	1		1		1	0		0	7.72	6.94	0.39	131	17.7949	335.897	30	35	7.62	125.2	142.5-140.6	140.6	140.46	142		41.13	15.81	15.872	0.87	20.4	21.48	1.69	290.4	330.39	320.43	350.67	320.07
198	162	60	22.8624						1				10	6	1			1	1	1		0	31.91	31.47	0.16	150	196.688	937.5	141	287	5.12	57.5	141.1-137.8	137.8	141.1	139.6		115.8	464.83	10.702	7.92	14.32	15.9	4.76	225.9	321.027	309.32	329.09	324.67
199	163	46	17.3134			1							31	8	1			1	1	1		0	3.81	2.58	0.94	33	2.74468	35.1064	72	172	17.14	172.1	143.6-136	136.8	142.5	136		19.42	195.68	0.337	1.6	19.15	100	1.16	393.7	428.923	409.43	420.89	456.45
200	178	75	23.6713	1	1	1				1			35	8	1			1	1	1		0	7.79	7.42	0.28	80	26.5	285.714	9	31	19.2	330.8	142.7-136	136	139.5	140.9		238.78	25223.5	44.418	8.66	19.25	21.71	3.06	403.6	463.063	490.54	467.98	430.67
201	170	45	15.5709	1		1	1		1				31	6	1			1	1	1		0	9.32	7.59	0.63	281	12.0476	446.032	14	10	3.54	61.4	138.43-120.52	120.52	123.28	137.74		124.07	89.63	0.194	1.29	13.67	12.54	1	207.6	292.96	290.34	310.09	278.45
202	155	45	18.7305		1								26	6	1			1	1	1		0	18.97	18.08	0.23	88	78.6087	382.609	111	62	5.48	46.4	139.6-135.7	135.7	141.4	139.6		93.45	38.61	5.97	8.13	13.3	20.83	2.1	231.1	272.65	230.43	278.09	309.43
203	150	33	14.6667			1							32	6	1			1	1	1		0	8.74	6.33	1.61	87	3.93168	54.0373	51.1	46.2	7.82	63.46	140.4-134.1	134.1	143	140.1		84.5	60.24	5.044	3.78	17.9	20.34	1.89	301.1	325.33	320.98	345.78	309.23
204	150	62	27.5556		1								14	6	1			1	1	1		0	10.37	9.82	0.25	108	39.28	432	32	34	10.05	183.4	135.53-131.75	135.53	133.51	131.75		197.1	18966.6	89.304	21.59	22.29	41.15	1.93	191.7	474.907	478.09	456.09	490.54
205	154	54	22.7694	1	1							1	24	6	1			1	3	1		0	4.94	4.49	0.24	76	18.7083	316.667	18	30	17.86	250.5	147.1-131.4	147.1	131.1	139.6		230.84	20000	58.077	12	35.89	42.9	3.88	214.4	462.36	409.09	478.67	499.32
206	157	70	28.3987	1					1				29	8	1			1	1	1		0	15.67	14.09	0.91	64	15.4835	70.3297	218	218	11.03	168.6	151.6-141.6	144.5	151.6	141.6		221.04	1313.98	56.843	43.96	24.32	34.65	2.02	182.1	442.283	467.09	420.67	439.09
[truncated: 2 more columns]
